# Supplementary material
Source: PubMed Central journal article supplement (PMC2673771)
Supplement: tjp0587-0999-SD1.pdf [file tjp0587-0999-SD1.pdf]

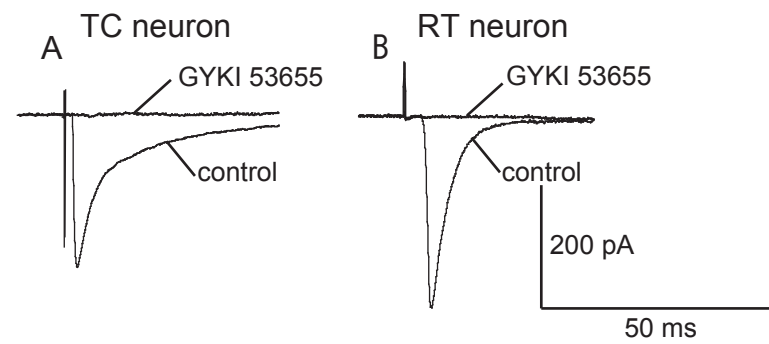

Supplemental Figure 1.

The effect of 50  $\mu$ M GYKI 53655 on AMPAR-mediated EPSCs in CT-TC and CT-RT synapses.

GYKI 53655 at 50  $\mu$ M evidently abolishes AMPAR-mediated EPSCs in the both neurons

(P21,  $V_h = -70$  mV,  $n=3$  of TC and RT neurons).
